# Supplementary material for: NiCo Nanoneedles on 3D Carbon Nanotubes/Carbon Foam Electrode as an Efficient Bi-Functional Catalyst for Electro-Oxidation of Water and Methanol
Source: MDPI journal article supplement (doi:10.3390/catal11040500), 2021-04-15
Supplement: s1 [file s1]

Supplementary Materials

# NiCo nanoneedles on 3D carbon nanotubes/carbon foam electrode as an efficient bifunctional catalyst for the electro-oxidation of water and methanol

Tung Ngoc Pham<sup>1,2\*</sup>, Ajaikumar Samikannu<sup>1</sup>, Solomon Tesfalidet<sup>1</sup>, Thomas Wågberg<sup>3</sup>, and Jyri-Pekka Mikkola<sup>1,4\*</sup>

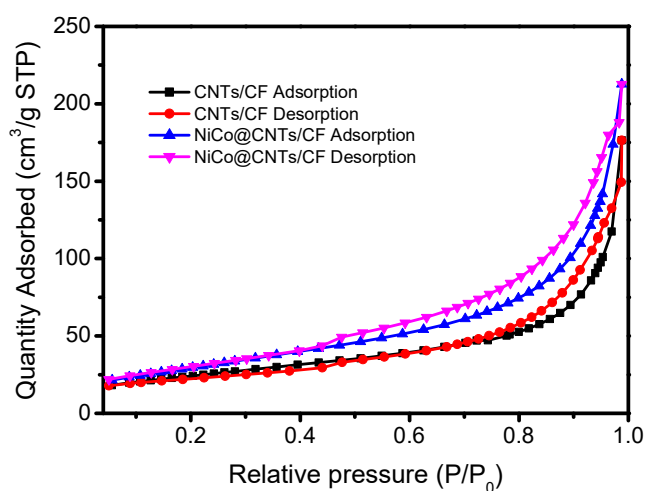

**Figure S1.** Nitrogen adsorption-desorption isotherm curves of CNTs/CF and NiCo@CNTs/CF samples

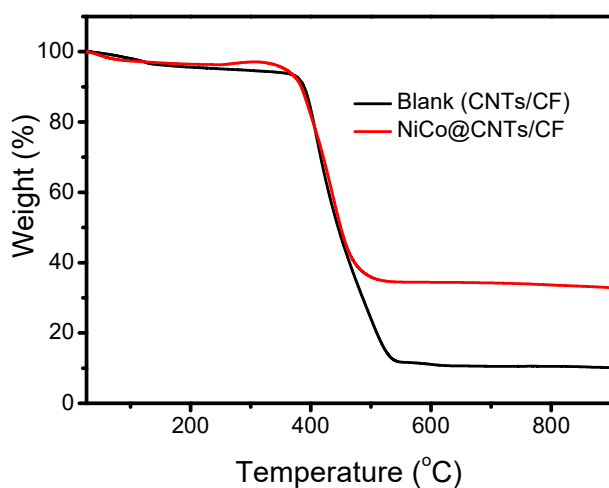

**Figure S2.** Thermogravimetric analysis results of the blank (CNTs/CF) and the NiCo@CNTs/CF sample.

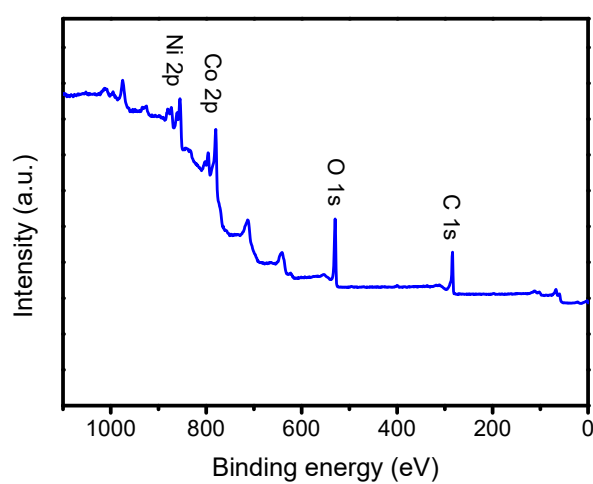

**Figure S3.** XPS wide spectra of the fresh NiCo@CNTs/CF samples.

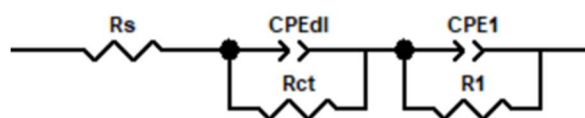

**Figure S4.** Equivalent circuit model used in the Nyquist plots.

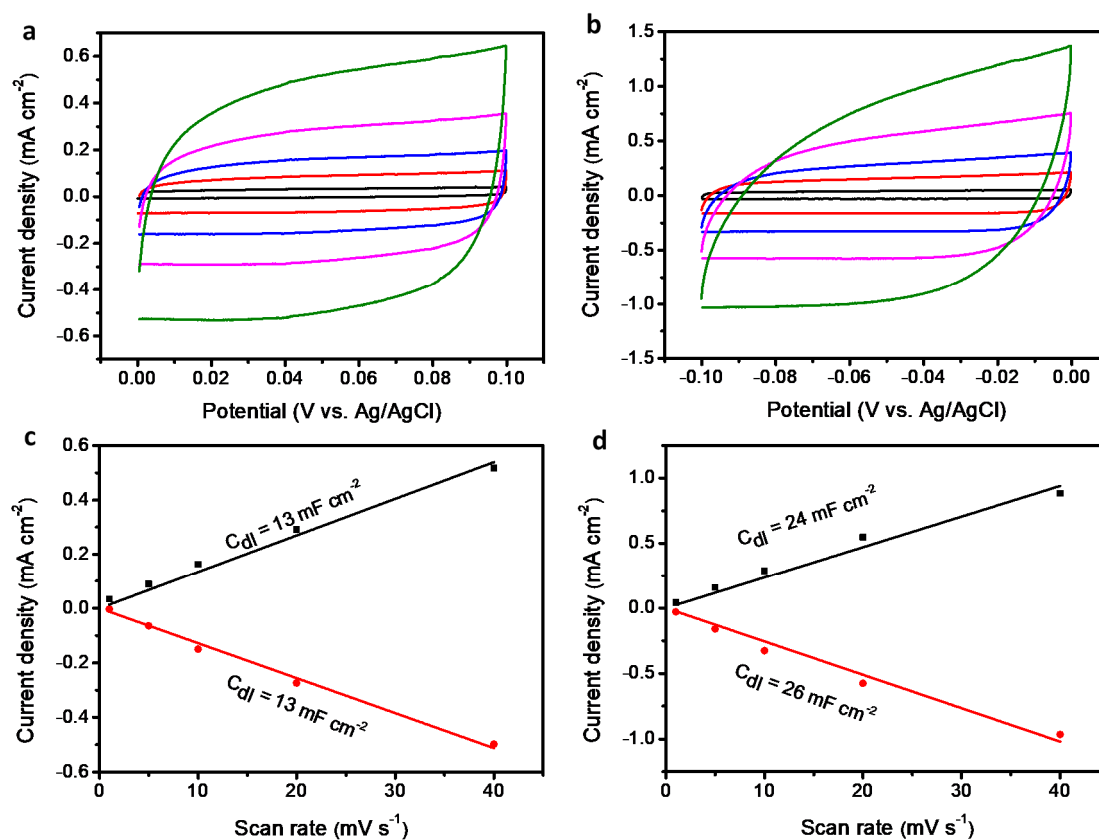

**Figure S5.** The CVs curves of the NiCo@CNTs/CF electrode before (a) and after (b) the anodization. The calculated  $C_{dl}$  of the electrode before (c) and after (d) the anodization.

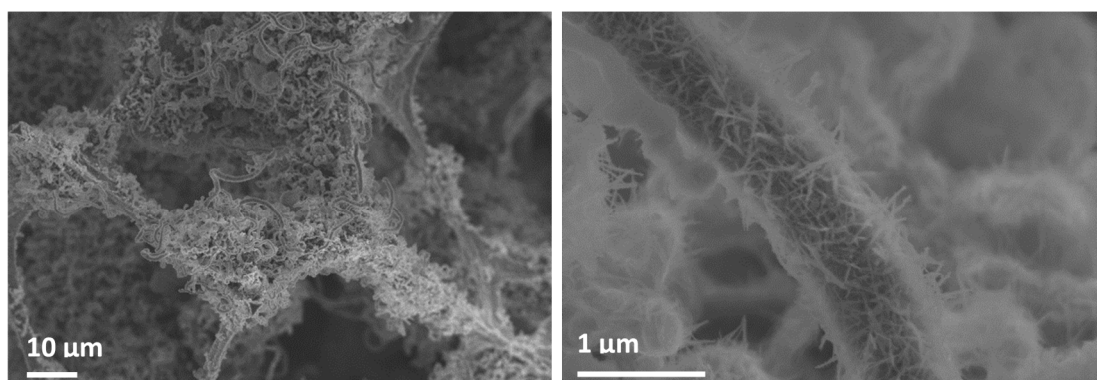

2

**Figure S6.** SEM images of the spent (after the third galvanostatic test) NiCo@CNTs/CF sample at low (left) and high (right) magnification.

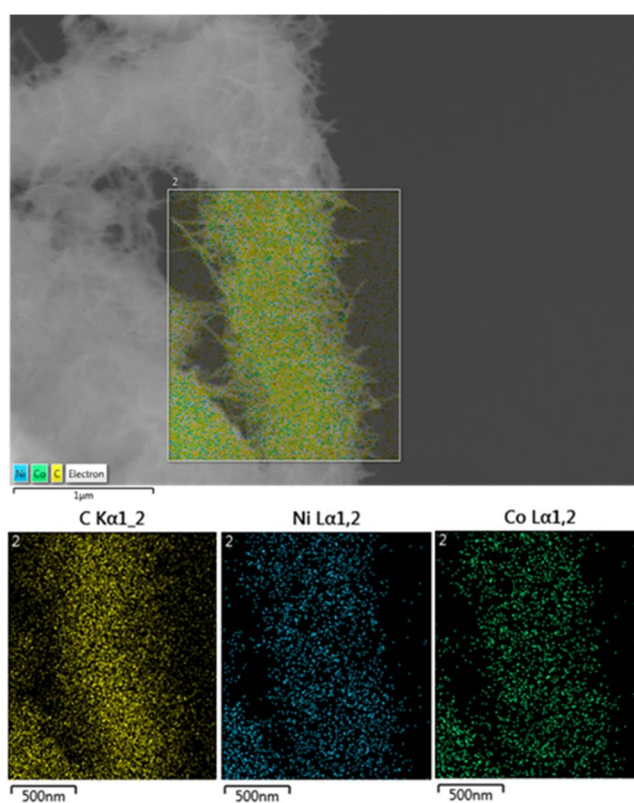

**Figure S7.** SEM-EDX mapping of C, Ni, and Co elements on the NiCo@CNTs/CF sample after the third galvanostatic test.

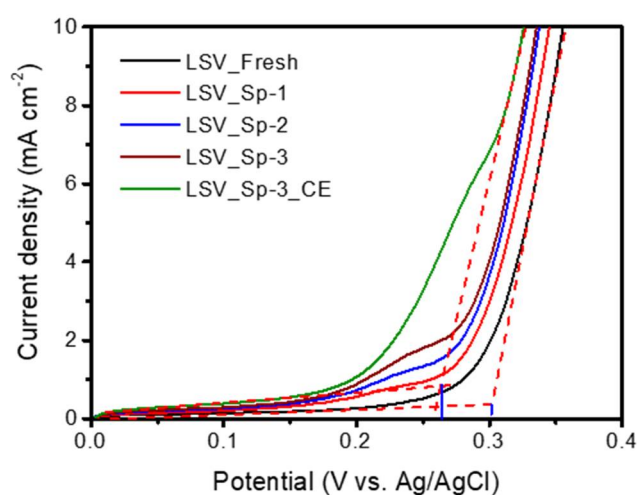

**Figure S8.** Determination of the onset potential before and after each potentiostatic test of the NiCo@CNTs/CF electrode (LSV\_Sp-3\_CE: The LSV was performed after the third potentiostatic test and then change the old electrolyte by the new electrolyte).

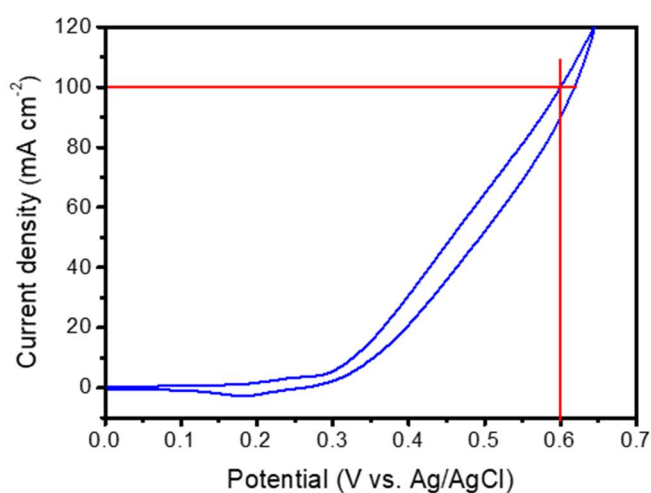

**Figure S9.** The CV curve of the NiCo@CNTs/CF electrode after the third potentiostatic test and change the electrolyte (1 M KOH + 0.5 M CH<sub>3</sub>OH) at a scan rate of 10 mV s<sup>-1</sup>.

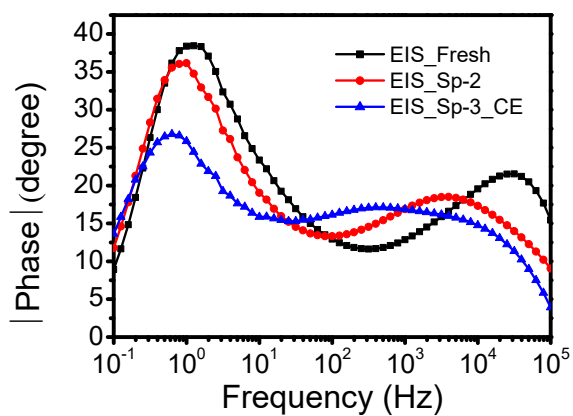

**Figure S10.** Bode-phase plots of the NiCo@CNTs/CF electrode at the potential of 0.3 V vs. Ag/AgCl

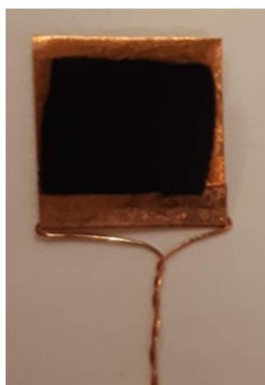

**Figure S11.** Picture of a carbon foam electrode before being covered by the carbon glue.

**Table S1.** Comparison of the OER performance of reported NiCo based electrocatalysts at the current density  $j_c = 10 \text{ mA cm}^{-2}$  in 1 M KOH electrolyte.

| Electro-catalyst                                                  | Substrate                                      | Overpotential (mV) | Tafel slope (mV dec <sup>-1</sup> ) | Reference  |
|-------------------------------------------------------------------|------------------------------------------------|--------------------|-------------------------------------|------------|
| NiCo hydroxides                                                   | CNTs/CF                                        | 320                | 82                                  | This work* |
| NiCo <sub>2</sub> O <sub>4</sub>                                  | Carbon fiber paper                             | 307                | 64                                  | [1]        |
| NiCo <sub>2</sub> O <sub>4</sub>                                  | Graphene nanosheets                            | 383                | 137                                 | [2]        |
| NiCo <sub>2</sub> O <sub>4</sub>                                  | Nickel foam                                    | 271                | 172                                 | [3]        |
| NiCo <sub>2</sub> O <sub>4</sub>                                  | Stainless steel                                | 293                | 43/142                              | [4]        |
| Co <sub>3</sub> O <sub>4</sub> / NiCo <sub>2</sub> O <sub>4</sub> | Nickel foam                                    | 340                | 88                                  | [5]        |
| NiCo <sub>2</sub> O <sub>4</sub>                                  | Glassy carbon-Rotating disk electrode (GC-RDE) | 340                | 75                                  | [6]        |
| NiCo <sub>2</sub> O <sub>4</sub>                                  | GC-RDE                                         | 280                | 50                                  | [7]        |
| NiCo <sub>2</sub> O <sub>4</sub> /Ti <sub>4</sub> O <sub>7</sub>  | GC                                             | 398                | 64                                  | [8]        |
| NiCo <sub>2</sub> O <sub>4</sub>                                  | Fluorine-doped tin oxide                       | 375                | 54                                  | [9]        |
| NiCo-LDH                                                          | Nickel foam                                    | 271                | 72                                  | [10]       |
| NiFeO <sub>x</sub>                                                | Carbon fiber paper                             | 230                | 73.6                                | [11]       |
| Ni-Fe NPs                                                         | Nickel foam                                    | 210                | 53                                  | [12]       |

\* After the anodization.

**Table S2.** Comparison of the MOR performance of reported NiCo based electrocatalysts in 1 M KOH + 0.5 M CH<sub>3</sub>OH electrolyte.

| Electro-catalyst                                                  | Scan rate (mV s <sup>-1</sup> ) | Applied voltage   | Current density (mA cm <sup>-2</sup> ) | Reference  |
|-------------------------------------------------------------------|---------------------------------|-------------------|----------------------------------------|------------|
| NiCo@CNTs/CF                                                      | 10                              | 0.6 V vs. Ag/AgCl | 100                                    | This work* |
| NiCo <sub>2</sub> O <sub>4</sub> nanosheet                        | 10                              | 0.6 V vs. SCE     | 111                                    | [13]       |
| NiCo <sub>2</sub> O <sub>4</sub> /carbon xerogel                  | 50                              | 0.6 V vs. Ag/AgCl | 98                                     | [14]       |
| NiCo <sub>2</sub> O <sub>4</sub> nanoparticles                    | 10                              | 0.6 V vs. Hg/HgO  | 93                                     | [15]       |
| NiCo <sub>2</sub> O <sub>4</sub>                                  | 10                              | 0.6 V vs. Hg/HgO  | 98                                     | [16]       |
| Mesoporous NiCo <sub>2</sub> O <sub>4</sub>                       | 10                              | 0.6 V vs. Hg/HgO  | 125                                    | [17]       |
| Co <sub>3</sub> O <sub>4</sub> / NiCo <sub>2</sub> O <sub>4</sub> | 10                              | 0.6 V vs. Hg/HgO  | 140                                    | [18]       |
| NiO nanosheets@nanowire                                           | 10                              | 1.62 V vs. RHE    | 89                                     | [19]       |

\* After the third potentiostatic test and change of the new electrolyte.

## References

1. Yu, C.; Liu, Z.; Han, X.; Huang, H.; Zhao, C.; Yang, J.; Qiu, J. NiCo-layered double hydroxides vertically assembled on carbon fiber papers as binder-free high-active electrocatalysts for water oxidation. *Carbon* **2016**, *110*, 1-7.
2. Li, Z.; Li, B.; Chen, J.; Pang, Q.; Shen, P. Spinel NiCo<sub>2</sub>O<sub>4</sub> 3-D nanoflowers supported on graphene nanosheets as efficient electrocatalyst for oxygen evolution reaction. *International Journal of Hydrogen Energy* **2019**, *44*, 16120-16131.
3. Gong, Y.; Pan, H.; Xu, Z.; Yang, Z.; Lin, Y.; Zhang, M. ACo<sub>2</sub>O<sub>4</sub> (A= Ni, Zn, Mn) nanostructure arrays grown on nickel foam as efficient electrocatalysts for oxygen evolution reaction. *International Journal of Hydrogen Energy* **2018**, *43*, 14360-14368.
4. Wu, L.-K.; Xia, J.; Cao, H.-Z.; Tang, Y.-P.; Hou, G.-Y.; Zheng, G.-Q. Highly active and durable cauliflower-like NiCo<sub>2</sub>O<sub>4</sub> film for oxygen evolution with electrodeposited SiO<sub>2</sub> as template. *International Journal of Hydrogen Energy* **2017**, *42*, 10813-10825.
5. Hu, H.; Guan, B.; Xia, B.; Lou, X.W. Designed formation of Co<sub>3</sub>O<sub>4</sub>/NiCo<sub>2</sub>O<sub>4</sub> double-shelled nanocages with enhanced pseudocapacitive and electrocatalytic properties. *Journal of the American Chemical Society* **2015**, *137*, 5590-5595.
6. Lv, X.; Zhu, Y.; Jiang, H.; Yang, X.; Liu, Y.; Su, Y.; Huang, J.; Yao, Y.; Li, C. Hollow mesoporous NiCo<sub>2</sub>O<sub>4</sub> nanocages as efficient electrocatalysts for oxygen evolution reaction. *Dalton Transactions* **2015**, *44*, 4148-4154.
7. Faïd, A.; Ismail, H. Highly active and easily fabricated NiCo<sub>2</sub>O<sub>4</sub> nanoflowers for enhanced methanol oxidation. **2019**.
8. Zheng, Z.; Geng, W.; Wang, Y.; Huang, Y.; Qi, T. NiCo<sub>2</sub>O<sub>4</sub> nanoflakes supported on titanium suboxide as a highly efficient electrocatalyst towards oxygen evolution reaction. *International Journal of Hydrogen Energy* **2017**, *42*, 119-124.
9. He, J.; Sun, Y.; Wang, M.; Geng, Z.; Wu, X.; Wang, L.; Chen, H.; Huang, K.; Feng, S. Direct growth of NiCo<sub>2</sub>O<sub>4</sub> nanostructure on conductive substrate by electrospray technique for oxygen evolution reaction. *Journal of Alloys and Compounds* **2018**, *752*, 389-394.
10. Liu, W.; Bao, J.; Guan, M.; Zhao, Y.; Lian, J.; Qiu, J.; Xu, L.; Huang, Y.; Qian, J.; Li, H. Nickel-cobalt-layered double hydroxide nanosheet arrays on Ni foam as a bifunctional electrocatalyst for overall water splitting. *Dalton Transactions* **2017**, *46*, 8372-8376.
11. Wang, H. et al. Bifunctional non-noble metal oxide nanoparticle electrocatalysts through lithium-induced conversion for overall water splitting. *Nature communications* **2015**, *6*, 1-8.
12. Suryanto, B. H.; Wang, Y.; Hocking, R. K.; Adamson, W. & Zhao, C. Overall electrochemical splitting of water at the heterogeneous interface of nickel and iron oxide. *Nature Communications* **2019**, *10*, 1-10.
13. Wang, W.; Chu, Q.; Zhang, Y.; Zhu, W.; Wang, X.; Liu, X. Nickel foam supported mesoporous NiCo<sub>2</sub>O<sub>4</sub> arrays with excellent methanol electro-oxidation performance. *New Journal of Chemistry* **2015**, *39*, 6491-6497.
14. El-Deeb, M.M.; El Rouby, W.M.; Abdelwahab, A.; Farghali, A.A. Effect of pore geometry on the electrocatalytic performance of nickel cobaltite/carbon xerogel nanocomposite for methanol oxidation. *Electrochimica Acta* **2018**, *259*, 77-85.
15. Ding, R.; Qi, L.; Jia, M.; Wang, H. Simple hydrothermal synthesis of mesoporous spinel NiCo<sub>2</sub>O<sub>4</sub> nanoparticles and their catalytic behavior in CH<sub>3</sub>OH electro-oxidation and H<sub>2</sub>O<sub>2</sub> electro-reduction. *Catalysis Science & Technology* **2013**, *3*, 3207-3215.
16. Ding, R.; Qi, L.; Jia, M.; Wang, H. Porous NiCo<sub>2</sub>O<sub>4</sub> nanostructures as bi-functional electrocatalysts for CH<sub>3</sub>OH oxidation reaction and H<sub>2</sub>O<sub>2</sub> reduction reaction. *Electrochimica Acta* **2013**, *113*, 290-301.
17. Ding, R.; Qi, L.; Jia, M.; Wang, H. Sodium dodecyl sulfate-assisted hydrothermal synthesis of mesoporous nickel cobaltite nanoparticles with enhanced catalytic activity for methanol electrooxidation. *Journal of Power Sources* **2014**, *251*, 287-295.
18. Qian, L.; Luo, S.; Wu, L.; Hu, X.; Chen, W.; Wang, X. In situ growth of metal organic frameworks derived hierarchical hollow porous Co<sub>3</sub>O<sub>4</sub>/NiCo<sub>2</sub>O<sub>4</sub> nanocomposites on nickel foam as self-supported flexible electrode for methanol electrocatalytic oxidation. *Applied Surface Science* **2020**, *503*, 144306.
19. Luo, Q.; Peng, M.; Sun, X.; Asiri, A.M. Hierarchical nickel oxide nanosheet@ nanowire arrays on nickel foam: an efficient 3D electrode for methanol electro-oxidation. *Catalysis Science & Technology* **2016**, *6*, 1157-1161.
